# Supplementary material for: Multiple electrochemically accessible colour states in surface-confined metal–organic monolayers: stepwise embedding of individual metal centres
Source: Royal Society of Chemistry journal article supplement (doi:10.1039/d0ma00735h), 2020-12-21
Supplement: d0ma00735h1.pdf [file d0ma00735h1.pdf]

# Multiple electrochemically accessible colour states in surface-confined metal-organic monolayers: Stepwise embedding individual metal centres

Nadia O. Laschuk,<sup>a</sup> Rana Ahmad,<sup>a</sup> Iraklii I. Ebralidze,<sup>a</sup> Jade Poisson,<sup>a</sup> Franco Gaspari,<sup>a</sup> E. Bradley Easton,<sup>a</sup> and Olena V. Zenkina\*<sup>a</sup>

<sup>a</sup> Faculty of Science, Ontario Tech University, 2000 Simcoe Street North, Oshawa, ON, L1H 7K4, Canada.

\*Corresponding Author. E-mail: [olena.zenkina@ontariotechu.ca](mailto:olena.zenkina@ontariotechu.ca);

Web: <https://faculty.ontariotechu.ca/zenkina/>

## Electronic Supplementary Information

### The results of selected electrochemical measurements.

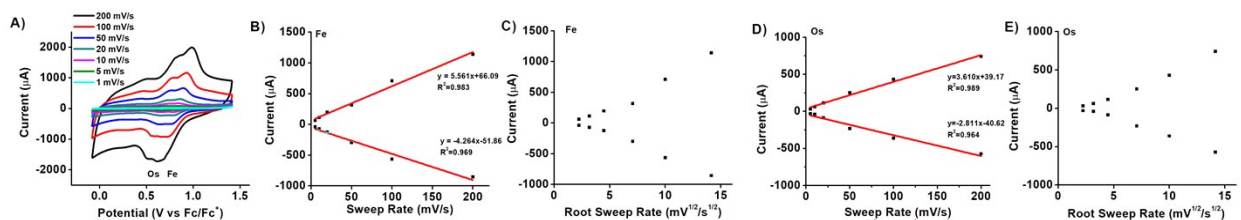

**Figure S1.** CV of Os-Fe stepwise ECM **A)** varying scan rates, **B)** peak current versus scan rate at Fe E<sub>1/2</sub>, **C)** peak current versus root of scan rate at Fe E<sub>1/2</sub>, **D)** peak current versus scan rate at Os E<sub>1/2</sub>, **E)** peak current versus root of scan rate at Os E<sub>1/2</sub>.

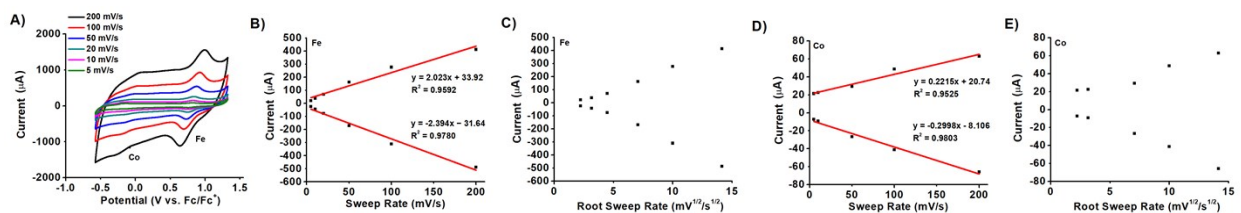

**Figure S2.** CV of Co-Fe stepwise ECM **A)** varying scan rates, **B)** peak current versus scan rate at Fe E<sub>1/2</sub>, **C)** peak current versus root of the scan rate at Fe E<sub>1/2</sub>, **D)** peak current versus scan rate at Co E<sub>1/2</sub>, and **E)** peak current versus root of the scan rate at Co E<sub>1/2</sub>.

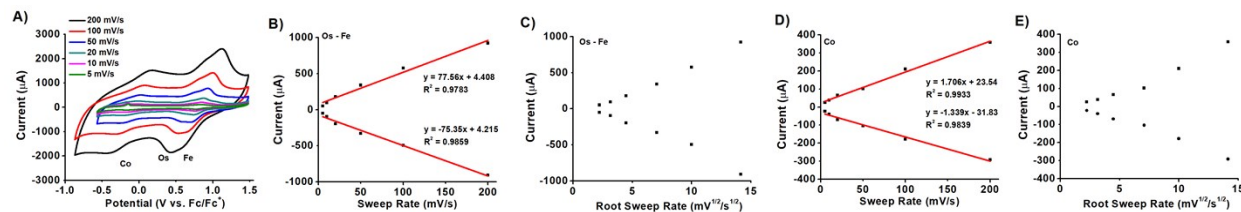

**Figure S3.** CV of Co-Os-Fe stepwise ECM **A)** varying sweep rates, **B)** peak current versus sweep rate at Os-Fe  $E_{1/2}$ , **c)** peak current versus root of the sweep rate at Fe+Os  $E_{1/2}$ , **c)** peak current versus sweep rate at Co  $E_{1/2}$ , and **d)** peak current versus root of the sweep rate at Co  $E_{1/2}$ .

### The results of selected XPS measurements

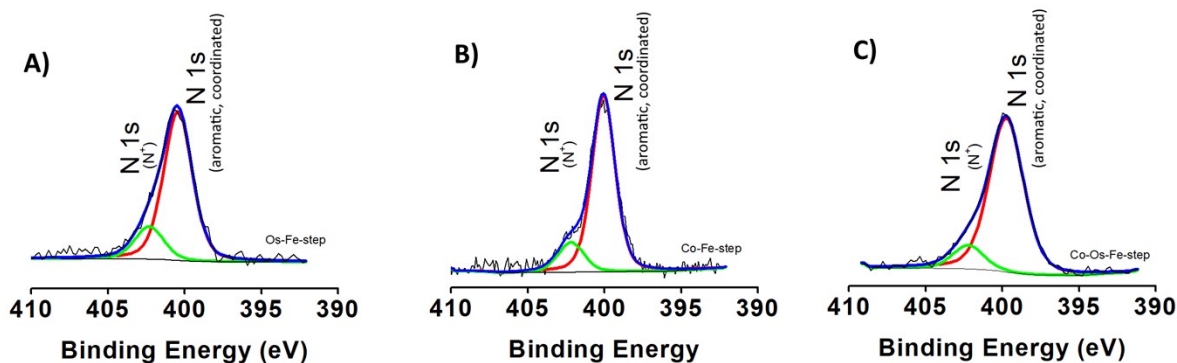

**Figure S4.** X-ray photoelectron spectroscopy (XPS) spectra showing the N 1s regions for A) Os-Fe, B) Co-Fe, and C) Co-Os-Fe ECMs

### Laviron Kinetics of ECM

CVs at fast scan rates were plotted versus the log of the peak potential (Figure S4-S6) and their slopes determined to give the electron transfer coefficient  $\alpha$ :

$$\alpha = \frac{s_a}{(s_a - s_c)}$$

The electron transport constants ( $k_{ET}$ ) of materials were calculated from the following formula:

$$k_{ET} = \frac{anFv_c}{RT} = \frac{(1 - \alpha)Fv_a}{RT}$$

where  $v_a$  and  $v_c$  are the scan rates where the slope intersects the x-axis and the anodic or cathodic branches, respectively. A symmetry exhibited in the Laviron (aka trumpet) plots (Figure S5-S7) is a consequence of transfer coefficient values being close to 0.5.

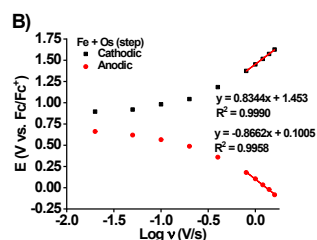

**Figure S5:** Laviron plot for Os-Fe stepwise ECMs. At high scan rates, it was impossible to distinguish between the Os and Fe peaks. The constant determined evaluates joint electron rate for Os and Fe species.

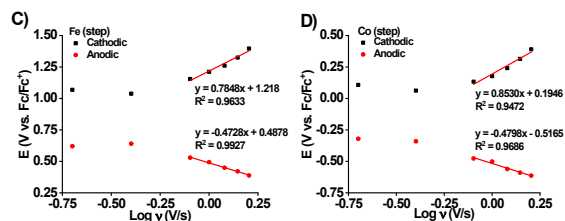

**Figure S6:** Laviron plot for Co-Fe stepwise ECMs: **c) Fe** and **d) Co**.

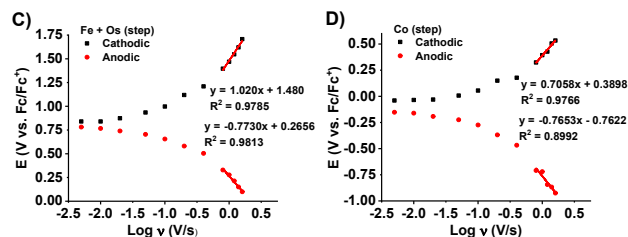

**Figure S7:** Laviron plot for Fe + Os + Co stepwise ECM at **c) Fe** and Os, and **d) Co**.

**Table S1.** Electron transfer-rate constants of ECM obtained from cyclic voltammetry.

| Metal System          | $k_{ET}$ ( $s^{-1}$ ) |    |               |
|-----------------------|-----------------------|----|---------------|
|                       | Fe                    | Os | Co            |
| Sequential Deposition |                       |    |               |
| Os-Fe                 | $3.3 \pm 0.3$         |    |               |
| Co-Fe                 | $4.6 \pm 0.5$         |    | $5.3 \pm 0.8$ |
| Fe + Os + Co          | $5.1 \pm 1.1$         |    | $3.0 \pm 0.8$ |

**Table S2.** Diffusion coefficient and internal resistance magnitude for the ECMs.  $E_{1/2(M)}$  represents the electrochemical potential of the metal in which the constant was determined at.

| ECM      | $D$ ( $cm^2 s^{-1}$ ) |                     |                     | $R_S$ ( $\Omega \cdot cm^2$ ) |                  |                  | $R_S$ ( $\Omega \cdot sq$ ) |
|----------|-----------------------|---------------------|---------------------|-------------------------------|------------------|------------------|-----------------------------|
|          | $E_{1/2(Fe)}$         | $E_{1/2(Os)}$       | $E_{1/2(Co)}$       | $E_{1/2(Fe)}$                 | $E_{1/2(Os)}$    | $E_{1/2(Co)}$    |                             |
| Os-Fe    | $1.1 \cdot 10^{-9}$   | $1.4 \cdot 10^{-9}$ | -                   | $1.5 \cdot 10^2$              | $1.3 \cdot 10^2$ | -                | 164                         |
| Co-Fe    | $2.7 \cdot 10^{-9}$   | -                   | $1.1 \cdot 10^{-9}$ | $1.0 \cdot 10^2$              | -                | 99               | 149                         |
| Co-Os-Fe | $4.4 \cdot 10^{-9}$   |                     | $2.0 \cdot 10^{-9}$ | 79                            |                  | $1.3 \cdot 10^2$ | 156                         |

**The results of selected spectroelectrochemical measurements.**

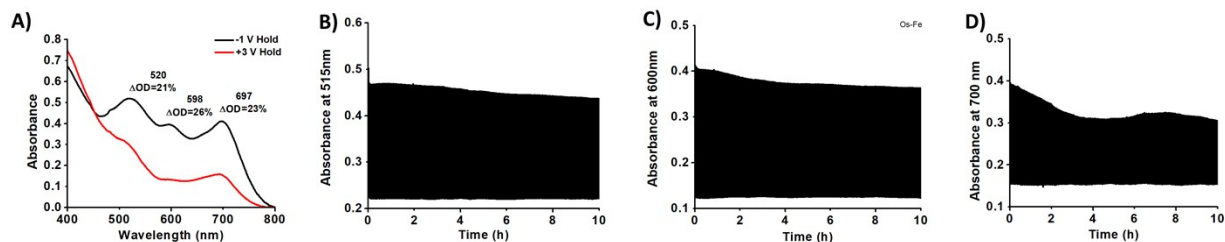

**Figure S8.** Spectroelectrochemical results for the Os-Fe stepwise ECM using -1V and +3V holds: **A)** UV-Vis spectra, and durability cycling with 60s holds: **B)** at 515 nm, **C)** at 600 nm, **D)** at 700 nm.

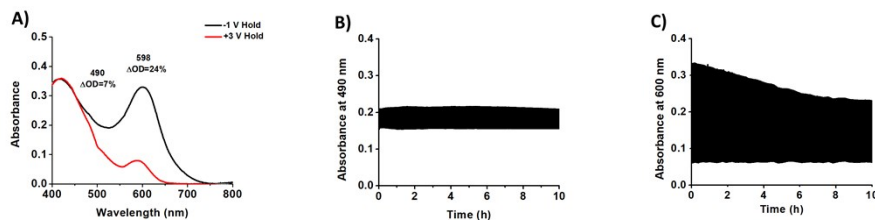

**Figure S9.** Spectroelectrochemical results for the Co-Fe stepwise ECM using -1V and +3V holds **A)** UV-Vis, and durability cycling with 60s holds: **B)** at 490 nm, **C)** at 600 nm.

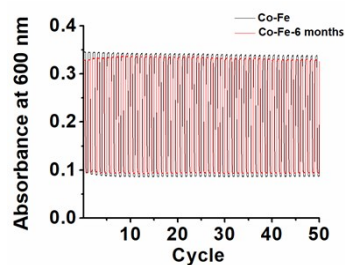

**Figure S10.** Reproducibility test: Chronoabsorptometry of Co-Fe ECDs prepared six month apart by screen printing of different batches of screen-printed paste, followed by depositin of 4-(chloromethyl)phenyltrichlorosilane taken from different bottles, subsequently depositing of metal complexes from different batches and using separately prepared batches of gel electrolyte.
